# Supplementary material
Source: PubMed Central journal article supplement (PMC4221240)

# Supplemental figure 1

— Non-adherent cells      ..... After 3-day culture with M-CSF

F4/80

CD80

CD86

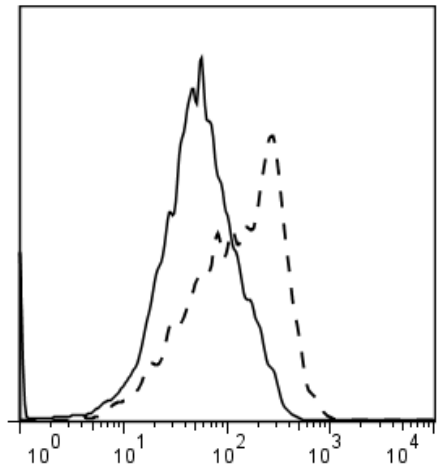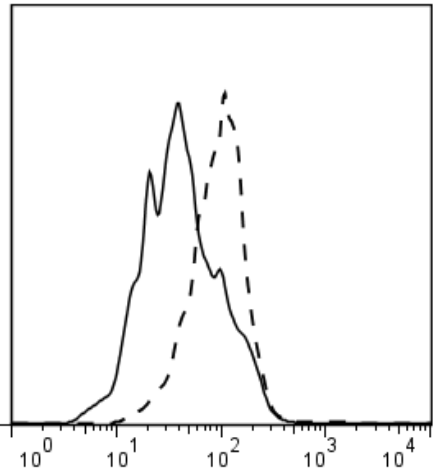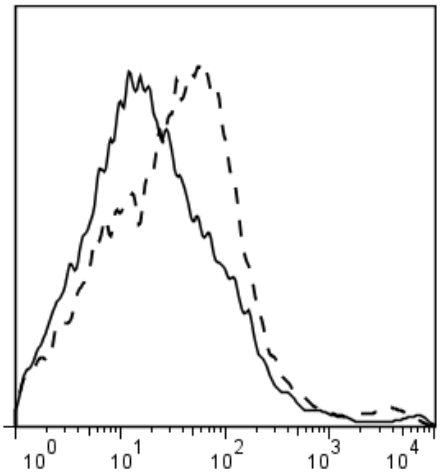

# Supplemental figure 2

a

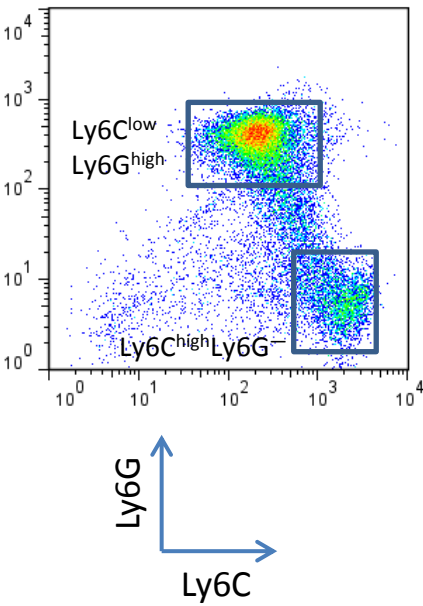

b

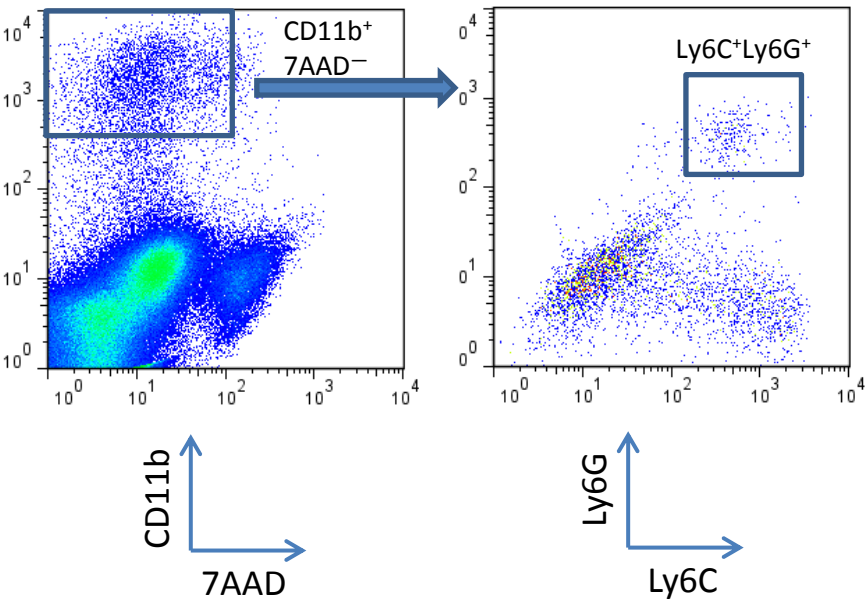

# Supplemental figure 3

a

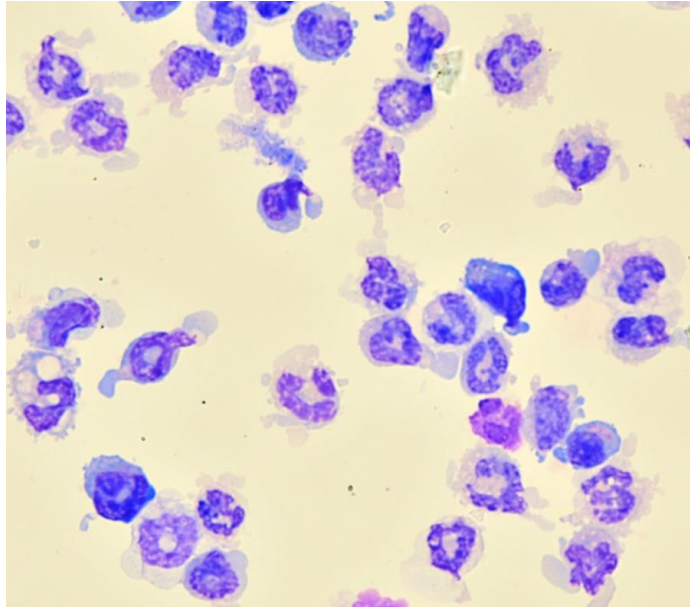

b

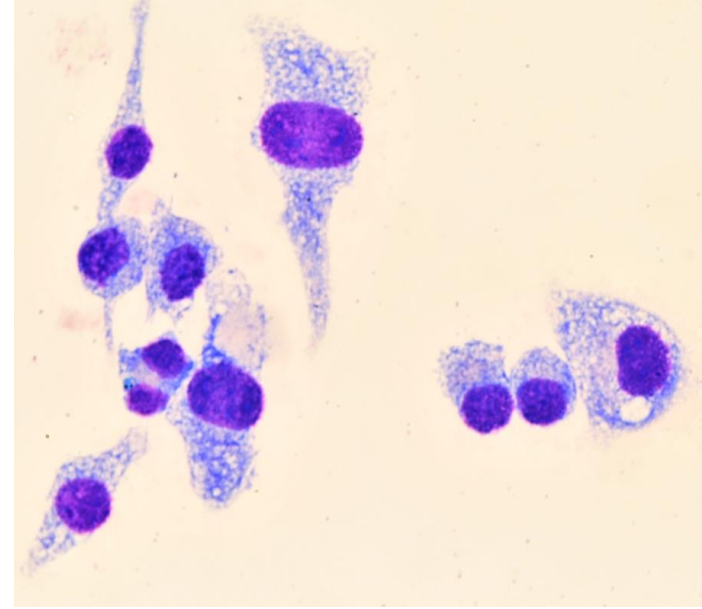

c

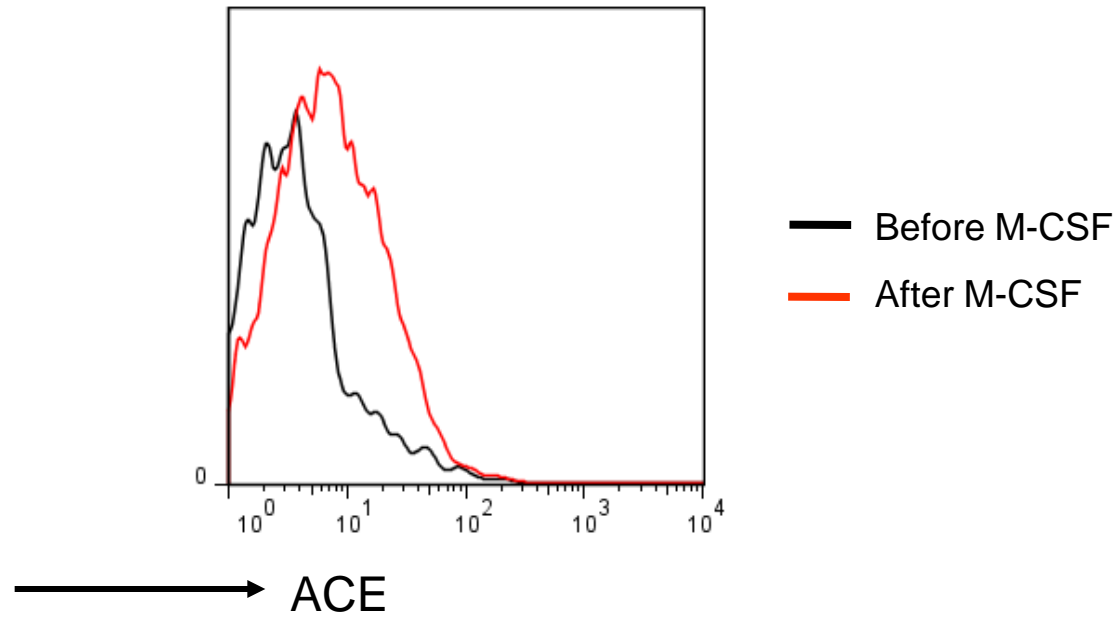

Supplemental figure 4

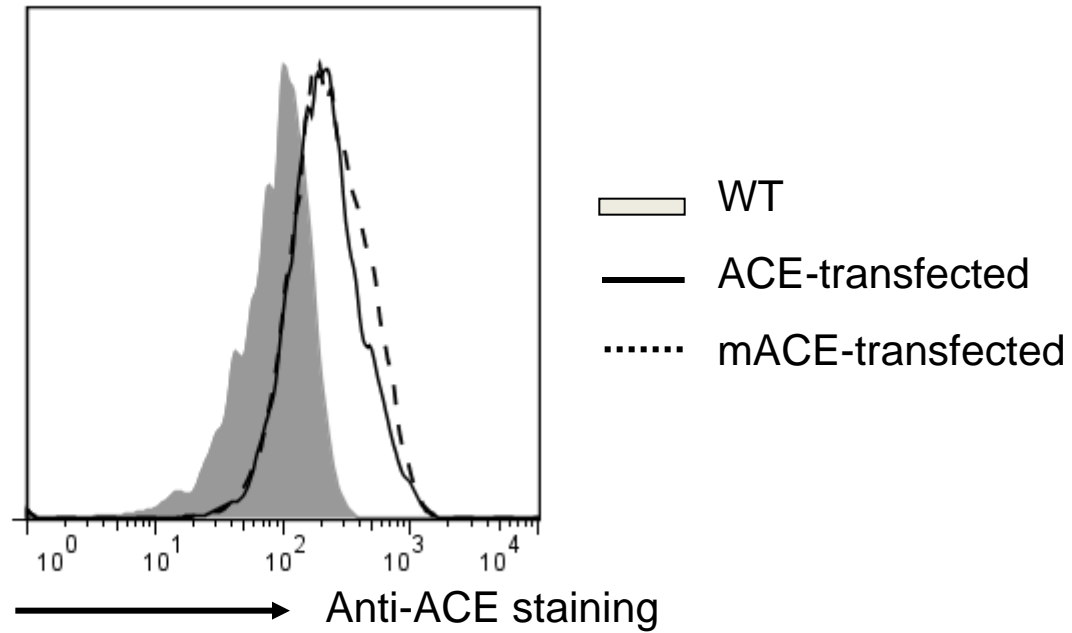

Supplemental figure 5

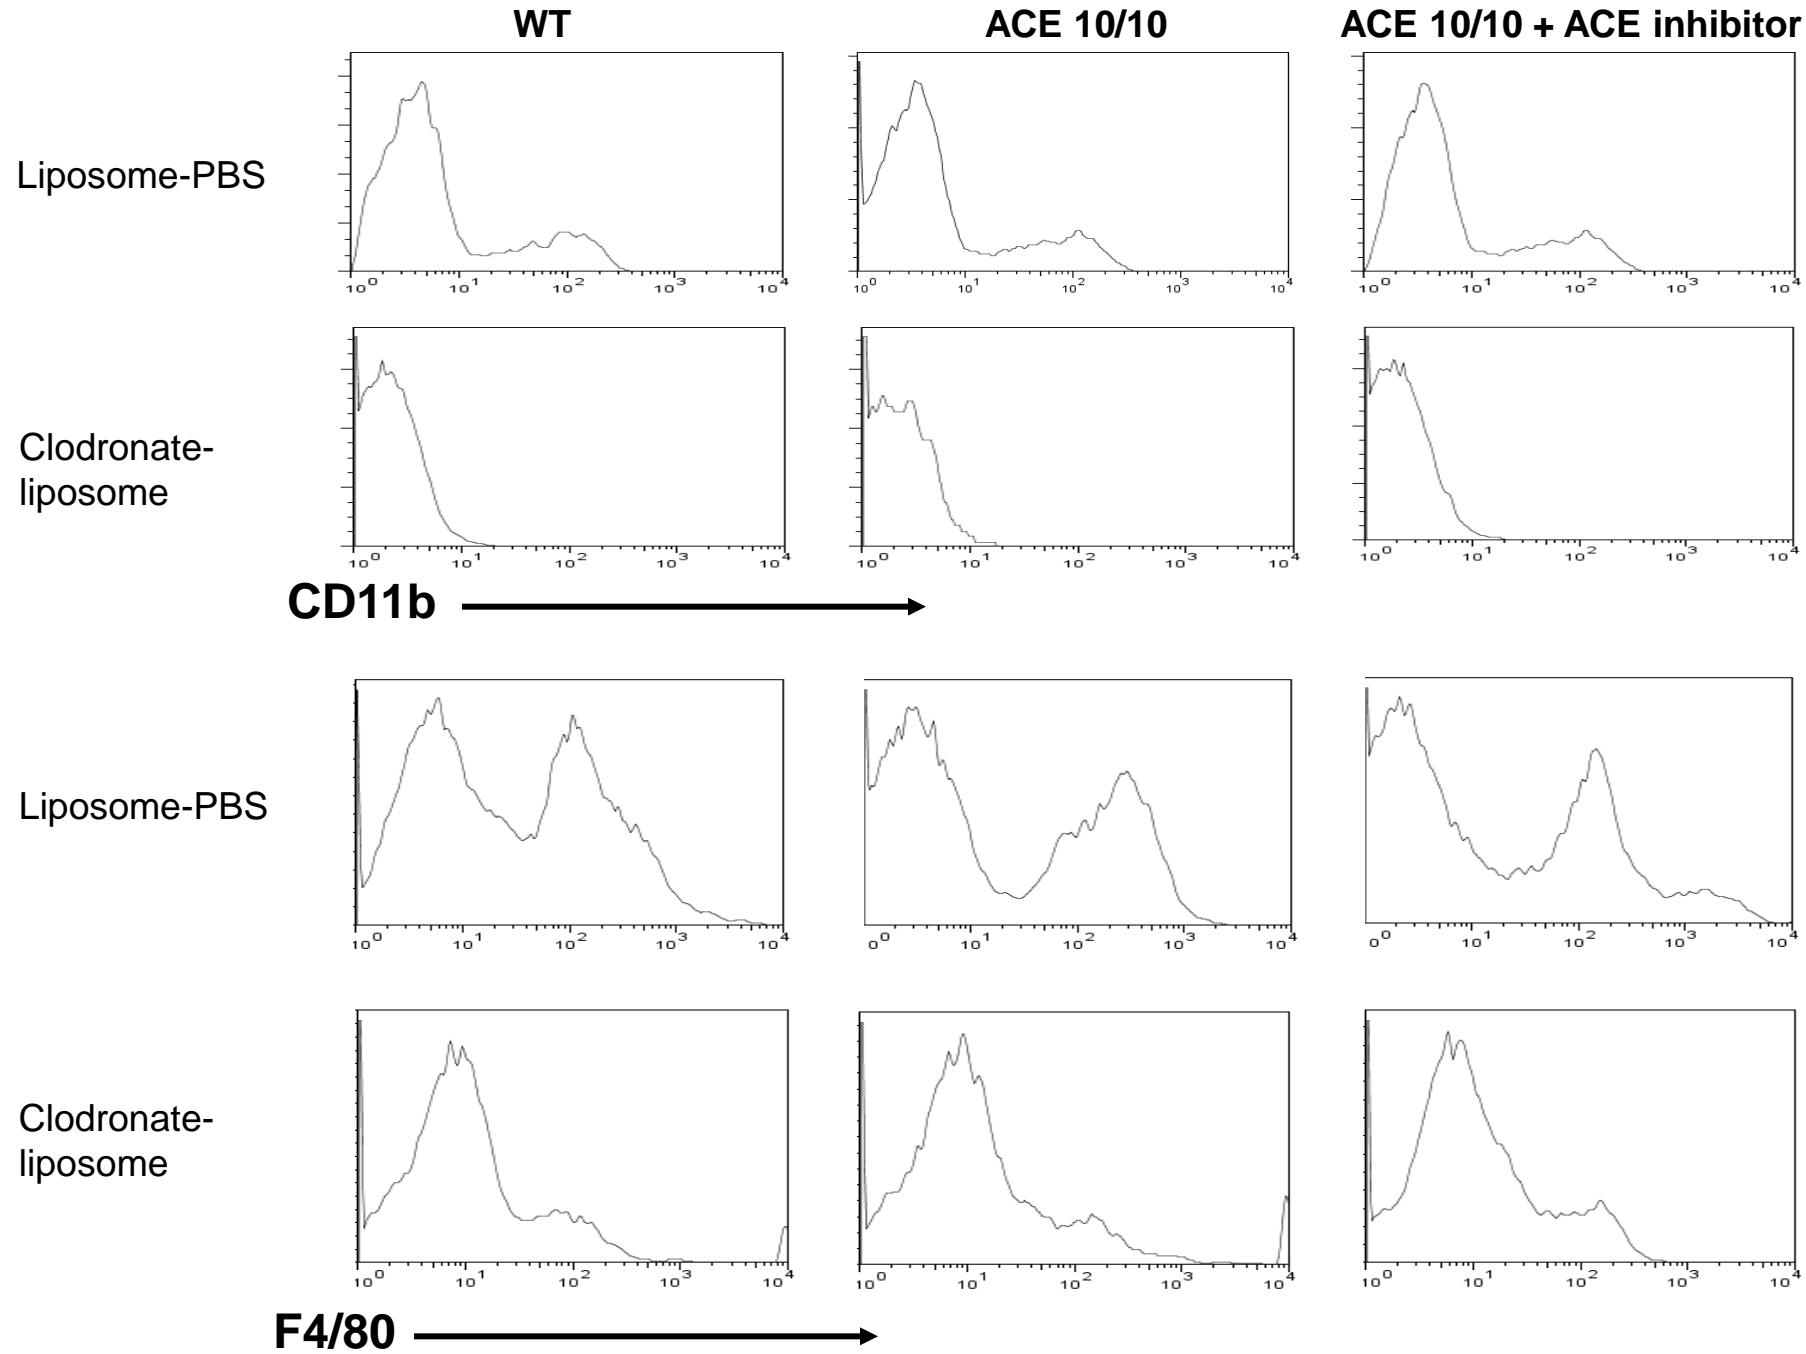

Supplement: NIHMS558869-supplement-2.pdf [file NIHMS558869-supplement-2.pdf]
